# Supplementary figures and images for: Atmospheric aerosol compositions over the South China Sea: Temporalvariability and source apportionment
Source: Copernicus journal article supplement (doi:10.5194/acp-2016-885), 2016-11-07

Figure S1. Plot from principal component analysis (PCA) for species and environmental variables.


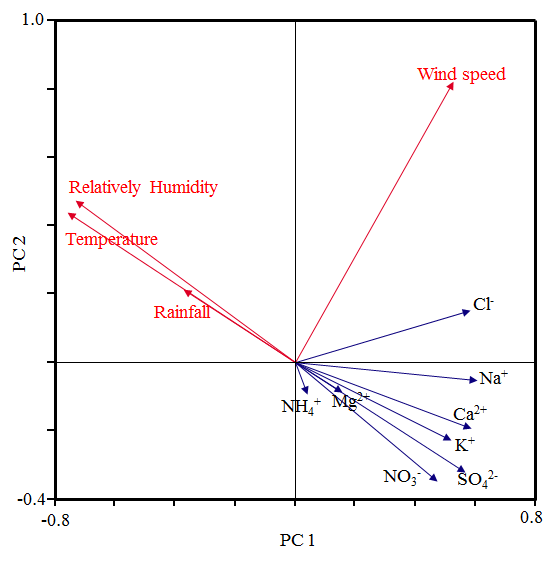

Supplement: Supplementary file 1 [file Fig. S1 Plot from principal component analysis (PCA) for species and environmental variables.docx]
